# Supplementary material for: Electronic coupling in 6,6″-donor-substituted terpyridines: tuning of the mixed valence state by proton and metal ion complexationElectronic supplementary information (ESI) available: Job plots of UV and fluorescence titration of 3 with Zn2+. See http://www.rsc.org/suppdata/cc/b1/b110289c/
Source: Royal Society of Chemistry journal article supplement (doi:10.1039/b110289c), 2002-05-22
Supplement: b110289c.pdf [file b110289c.pdf]

# Electronic Coupling in 6,6''-Donor-Substituted Terpyridines: Tuning of the Mixed Valence State by Proton and Metal Ion Complexation

M. Büschel, M. Helldobler, J. Daub

*Institut für Organische Chemie, Universität Regensburg, Universitätsstr. 31, D-93053-Regensburg*

## Supporting Information

Job plots for complexation of **3** with  $\text{Zn}(\text{ClO}_4)_2 \cdot 6\text{H}_2\text{O}$

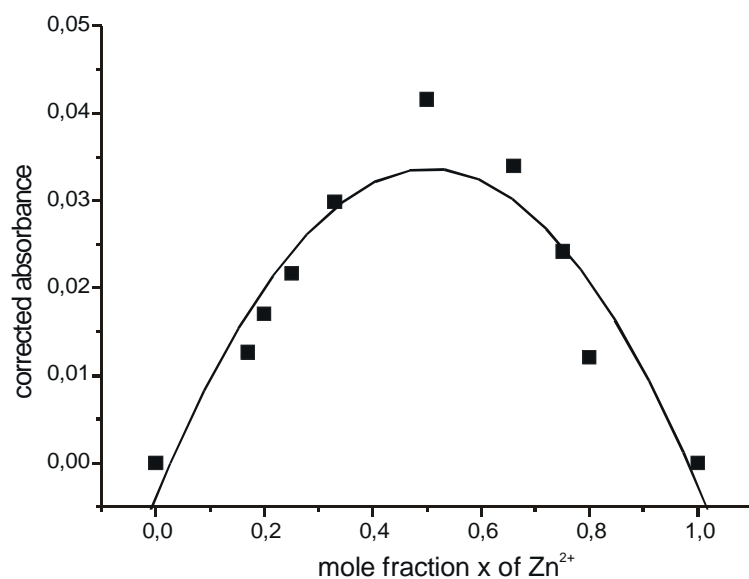

**Figure 1:** Job plot for formation of the (3)(Zn<sup>2+</sup>)-complex obtained by UV spectroscopy ( $\lambda = 386 \text{ nm}$ ).

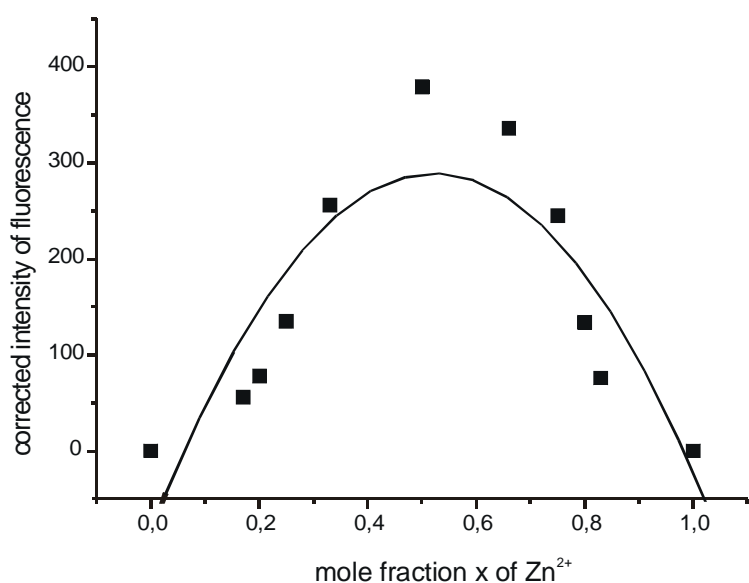

**Figure 2:** Job plot for formation of the (3)(Zn<sup>2+</sup>)-complex by fluorescence spectroscopy ( $\lambda = 502 \text{ nm}$ ).
